# Supplementary material for: Modelling of pancreatic cancer biology: transcriptomic signature for 3D PDX-derived organoids and primary cell line organoid development
Source: PubMed Central journal article supplement (PMC7026166; doi:10.1038/s41598-020-59368-7), 2020-02-17
Supplement: 41598_2020_59368_MOESM1_ESM.pdf [file 41598_2020_59368_MOESM1_ESM.pdf]

**Modelling of pancreatic cancer biology: transcriptomic signature for 3D PDX-derived organoids and primary cell line organoid development**

Shannon R Nelson<sup>1</sup>, Chenxi Chang<sup>2,3</sup>, Sandra Roche<sup>1</sup>, Fiona O'Neill<sup>1</sup>, Niall Swan<sup>4</sup>, Yonglun Luo<sup>3,6</sup>, AnneMarie Larkin<sup>1,5</sup>, John Crown<sup>4</sup>, Naomi Walsh<sup>1\*</sup>

\*Correspondence to [naomi.walsh@dcu.ie](mailto:naomi.walsh@dcu.ie)

<sup>1</sup>National Institute for Cellular Biotechnology, School of Biotechnology, Dublin City University, Dublin 9, Ireland

<sup>2</sup>BGI Education Centre, University of Chinese Academy of Sciences, Shenzhen 518083, China

<sup>3</sup>Lars Bolund Institute of Regenerative Medicine, BGI-Qingdao, BGI-Shenzhen, Qingdao, 266000, China

<sup>4</sup>St Vincent's University Hospital Elm Park, Dublin 4, Ireland

<sup>5</sup>Institute of Technology, Sligo, Ash Lane, Sligo, Ireland

<sup>6</sup>Department of Biomedicine, Aarhus University, 8000, Aarhus, Denmark

## Supplementary Tables

*Supplementary Table 1 Basic Media*

| Reagent                                     | Stock Concentration | Volume  | Final Concentration |
|---------------------------------------------|---------------------|---------|---------------------|
| DMEM, high glucose,<br>GlutaMAX™ Supplement |                     | 100 mL  |                     |
| HEPES Buffer                                | 100X (1 M)          | 1 mL    | 1X (10 mM)          |
| Penicillin                                  | 100X                | 0.25 mL | 1X                  |

*Supplementary Table 2 Wash media*

|                                                     | Stock Concentration | Volume | Final Concentration |
|-----------------------------------------------------|---------------------|--------|---------------------|
| DMEM                                                |                     | 100 mL |                     |
| HEPES Buffer<br>(Sigma, H3375)                      | 100X (1 M)          | 1 mL   | 1X                  |
| L-Glutamine                                         | 100X                | 1 mL   | 1X                  |
| Penicillin-Streptomycin<br>(ThermoFisher, 15140122) | 100X                | 1 mL   | 1X                  |
| FBS                                                 | 100%                | 2.5 mL | 2.5% (v/v)          |

*Supplementary Table 3 Digestion media*

| Reagent                                   | Stock Concentration | Volume /<br>Mass | Final Concentration |
|-------------------------------------------|---------------------|------------------|---------------------|
| Basic Media                               |                     | 8 mL             |                     |
| Collagenase I<br>(ThermoFisher, 17018029) |                     | 40 mg            | 5 mg/mL             |
| Dispase II (Sigma, D4693)                 |                     | 10 mg            | 1.25 mg/mL          |
| FBS                                       | 100%                | 0.2 mL           | 2.50%               |

*Supplementary Table 4 Complete Human Feeding Media (Prewarm to 37 °C)*

| <b>Reagent</b>                                 | <b>Stock Concentration</b> | <b>Volume</b> | <b>Final Concentration</b> |
|------------------------------------------------|----------------------------|---------------|----------------------------|
| Basic Media                                    |                            | 20.6 mL       |                            |
| Conditioned Media                              |                            | 25 mL         | 50% v/v                    |
| A83-01 (Sigma, SML0788)                        | 1000X (0.5 mM)             | 50 µL         | 500 nM                     |
| hFGF10 (R&D, 345-FG-025/CF)                    | 1000X (100 µg/mL)          | 50 µL         | 100 ng/mL                  |
| Gastrin I (TOCRIS, 3006)                       | 1000X (10 µM)              | 50 µL         | 0.01 µM                    |
| N-acetylcysteine (R&D, 5619)                   | 400X (500 mM)              | 125 µL        | 1.25 mM                    |
| Nicotinamide (Sigma, N0636)                    | 100X (1M)                  | 500 µL        | 10 mM                      |
| B-27 Supplement (Life Technologies, 17504-044) | 50X                        | 1000 µL       | 1X                         |
| Y-27632(Sigma,Y0503)*                          | 1000X (10.5 mM)            | 50 µL         | 10.5 µM                    |

*\*Y-27632 (Rho Kinase Inhibitor) is only necessary when organoids are first prepared, when organoids are thawed, or when organoids are dissociated to single cells.*

*Supplementary table 5: Antibody conditions, secondary antibodies, suppliers and catalogue numbers for confocal microscopy .*

| <b>Antibody</b>        | <b>Concentration</b> | <b>Secondary</b> | <b>Supplier</b> | <b>Catalogue number</b> |
|------------------------|----------------------|------------------|-----------------|-------------------------|
| ALDH1A1                | 1:200                | Rabbit           | Abcam           | ab52492                 |
| CXCR4                  | 1:100                | Mouse            | SCBT            | sc-53534                |
| EpCAM                  | 1:50                 | Mouse            | SCBT            | sc-25308                |
| PDX1                   | 1:50                 | Rabbit           | Invitrogen      | PA514824                |
| Alexa Fluor 488 Mouse  | 1:1500               | -                | ThermoFisher    | A-11001                 |
| Alexa Fluor 488 Rabbit | 1:2000               | -                | ThermoFisher    | A-11008                 |

Supplementary table 6: Gene list – genes upregulated in both PT127 PDX and CLO when compared with PT127 cell line (fold change  $\geq 2$ ,  $p$ -adj= 0.001)

| Gene Name        | log2FoldChange | padj     |
|------------------|----------------|----------|
| <i>KIF12</i>     | 5.422          | 1.62E-62 |
| <i>CA12</i>      | 5.302          | 1.44E-19 |
| <i>LRIG1</i>     | 5.286          | 5.37E-57 |
| <i>LTB</i>       | 5.263          | 8.48E-05 |
| <i>FAM3B</i>     | 5.004          | 6.01E-51 |
| <i>TNFRSF11B</i> | 4.760          | 5.34E-09 |
| <i>SLC5A1</i>    | 4.749          | 1.95E-50 |
| <i>LCN2</i>      | 4.551          | 4.24E-12 |
| <i>PLEKHB1</i>   | 4.505          | 4.08E-13 |
| <i>DEGS2</i>     | 4.455          | 1.86E-07 |
| <i>FAM222A</i>   | 4.176          | 1.96E-08 |
| <i>NECTIN3</i>   | 3.920          | 4.77E-14 |
| <i>SELENBP1</i>  | 3.873          | 1.29E-12 |
| <i>GJB1</i>      | 3.831          | 1.06E-12 |
| <i>FILIP1L</i>   | 3.795          | 1.92E-14 |
| <i>MYH7B</i>     | 3.776          | 5.46E-07 |
| <i>PLB1</i>      | 3.748          | 2.16E-24 |
| <i>NR0B2</i>     | 3.738          | 4.10E-09 |
| <i>PLEKHS1</i>   | 3.669          | 3.63E-28 |
| <i>PLA2G4F</i>   | 3.638          | 1.05E-24 |
| <i>CLDN2</i>     | 3.594          | 4.09E-79 |
| <i>SLC9A3</i>    | 3.539          | 9.80E-12 |
| <i>C9orf152</i>  | 3.527          | 7.66E-12 |
| <i>SMIM24</i>    | 3.516          | 3.49E-09 |
| <i>KLK1</i>      | 3.488          | 8.79E-23 |
| <i>CCDC40</i>    | 3.452          | 1.39E-11 |
| <i>RSPH1</i>     | 3.418          | 1.59E-45 |
| <i>PSTPIP2</i>   | 3.394          | 4.18E-08 |
| <i>ITPR2</i>     | 3.386          | 5.38E-07 |
| <i>BRSK2</i>     | 3.365          | 0.00015  |
| <i>PTGER4</i>    | 3.344          | 1.79E-19 |
| <i>DAPK2</i>     | 3.338          | 6.65E-10 |
| <i>LINC01124</i> | 3.277          | 1.35E-07 |
| <i>ZSWIM5</i>    | 3.245          | 5.34E-20 |
| <i>AMACR</i>     | 3.235          | 1.17E-18 |
| <i>IGSF9</i>     | 3.175          | 2.46E-18 |
| <i>SEMA6A</i>    | 3.160          | 1.90E-06 |

|                  |       |          |
|------------------|-------|----------|
| <i>MEX3A</i>     | 3.125 | 2.64E-08 |
| <i>DEPTOR</i>    | 3.115 | 2.43E-52 |
| <i>EPHX2</i>     | 3.031 | 2.45E-18 |
| <i>LARGE2</i>    | 2.996 | 5.92E-06 |
| <i>TMEM229B</i>  | 2.979 | 9.77E-13 |
| <i>100288152</i> | 2.975 | 3.29E-08 |
| <i>MAP2K6</i>    | 2.963 | 4.38E-10 |
| <i>ATP10B</i>    | 2.953 | 7.15E-42 |
| <i>GPX2</i>      | 2.941 | 1.01E-31 |
| <i>SLC1A4</i>    | 2.927 | 1.58E-16 |
| <i>CRACR2A</i>   | 2.925 | 1.25E-05 |
| <i>RNASE1</i>    | 2.913 | 1.44E-08 |
| <i>SELENOM</i>   | 2.889 | 1.28E-21 |
| <i>RXFP4</i>     | 2.882 | 2.53E-09 |
| <i>RGMB</i>      | 2.871 | 3.57E-18 |
| <i>SEZ6L2</i>    | 2.867 | 1.46E-07 |
| <i>SLC4A8</i>    | 2.855 | 6.12E-06 |
| <i>MLLT3</i>     | 2.845 | 1.31E-19 |
| <i>BDH2</i>      | 2.839 | 3.17E-10 |
| <i>EPHB3</i>     | 2.809 | 6.31E-11 |
| <i>CRISPLD2</i>  | 2.797 | 0.00023  |
| <i>PDZK1</i>     | 2.786 | 6.55E-13 |
| <i>TPPP3</i>     | 2.755 | 3.95E-06 |
| <i>SP5</i>       | 2.753 | 0.00019  |
| <i>CCDC170</i>   | 2.751 | 1.43E-12 |
| <i>MDK</i>       | 2.746 | 1.34E-10 |
| <i>PAQR6</i>     | 2.738 | 0.00074  |
| <i>MAP1LC3A</i>  | 2.730 | 2.32E-14 |
| <i>RAB30</i>     | 2.718 | 1.91E-05 |
| <i>SOWAHA</i>    | 2.699 | 2.31E-14 |
| <i>NEDD9</i>     | 2.694 | 2.88E-05 |
| <i>ACSS1</i>     | 2.682 | 5.28E-20 |
| <i>MYCL</i>      | 2.673 | 5.40E-09 |
| <i>BCL2L14</i>   | 2.646 | 0.0002   |
| <i>HNF1A-AS1</i> | 2.643 | 5.24E-06 |
| <i>GPC2</i>      | 2.640 | 1.22E-06 |
| <i>SIAE</i>      | 2.640 | 4.95E-06 |
| <i>100124692</i> | 2.634 | 5.42E-34 |

|                 |       |          |
|-----------------|-------|----------|
| <i>KREMEN1</i>  | 2.604 | 4.31E-06 |
| <i>TSPOAP1</i>  | 2.579 | 1.86E-08 |
| <i>SELENOW</i>  | 2.579 | 1.13E-18 |
| <i>INPP5J</i>   | 2.543 | 7.16E-07 |
| <i>IFI6</i>     | 2.534 | 2.67E-05 |
| <i>MCF2L</i>    | 2.533 | 2.81E-10 |
| <i>RAB26</i>    | 2.519 | 4.82E-05 |
| <i>MGAM2</i>    | 2.517 | 3.09E-07 |
| <i>INKA2</i>    | 2.505 | 2.42E-14 |
| <i>ORMDL3</i>   | 2.505 | 2.02E-09 |
| <i>MAPK8IP1</i> | 2.498 | 2.49E-06 |
| <i>TNFAIP2</i>  | 2.496 | 1.92E-08 |
| <i>GRAMD2A</i>  | 2.490 | 5.35E-16 |
| <i>TGFB3</i>    | 2.452 | 0.00093  |
| <i>PDE4D</i>    | 2.445 | 1.06E-08 |
| <i>TOX3</i>     | 2.440 | 0.00029  |
| <i>ALDH1B1</i>  | 2.438 | 8.55E-53 |
| <i>HS6ST1</i>   | 2.417 | 6.87E-08 |
| <i>SLC29A4</i>  | 2.400 | 0.00014  |
| <i>AIFM3</i>    | 2.394 | 6.63E-10 |
| <i>ARHGEF40</i> | 2.394 | 3.02E-05 |
| <i>SCAMP5</i>   | 2.376 | 1.26E-12 |
| <i>FAAH</i>     | 2.375 | 5.63E-10 |
| <i>KCTD17</i>   | 2.360 | 1.83E-06 |
| <i>FOXA3</i>    | 2.360 | 1.43E-12 |
| <i>ETS2</i>     | 2.352 | 2.60E-32 |
| <i>GSDMB</i>    | 2.327 | 0.00041  |
| <i>SGSH</i>     | 2.324 | 4.02E-08 |
| <i>PAPSS2</i>   | 2.323 | 0.00042  |
| <i>PYCARD</i>   | 2.312 | 1.55E-06 |
| <i>ASRGL1</i>   | 2.276 | 7.24E-08 |
| <i>FKBP7</i>    | 2.267 | 0.00013  |
| <i>PLPP3</i>    | 2.266 | 0.00066  |
| <i>ALDH1A1</i>  | 2.259 | 2.75E-46 |
| <i>GATM</i>     | 2.258 | 4.67E-09 |

|                  |       |          |
|------------------|-------|----------|
| <i>ABAT</i>      | 2.244 | 2.45E-10 |
| <i>SOX9-AS1</i>  | 2.227 | 8.80E-05 |
| <i>FOXD4</i>     | 2.209 | 1.25E-05 |
| <i>ESPN</i>      | 2.190 | 2.55E-09 |
| <i>MYLIP</i>     | 2.189 | 1.25E-25 |
| <i>CCSER1</i>    | 2.187 | 0.00064  |
| <i>VIPR1</i>     | 2.178 | 7.25E-14 |
| <i>RN7SK</i>     | 2.167 | 1.06E-08 |
| <i>SERPINA4</i>  | 2.162 | 1.75E-07 |
| <i>IFI27</i>     | 2.151 | 0.00094  |
| <i>CEMP2</i>     | 2.148 | 1.16E-07 |
| <i>TESC</i>      | 2.138 | 2.12E-06 |
| <i>RBBP8NL</i>   | 2.134 | 4.95E-17 |
| <i>MMP11</i>     | 2.129 | 3.08E-08 |
| <i>CES3</i>      | 2.122 | 1.97E-11 |
| <i>AKR1C3</i>    | 2.118 | 2.76E-16 |
| <i>STXBP6</i>    | 2.107 | 3.33E-11 |
| <i>MLEC</i>      | 2.102 | 1.18E-11 |
| <i>QSOX1</i>     | 2.095 | 1.20E-14 |
| <i>NFIA</i>      | 2.086 | 2.62E-12 |
| <i>CHST6</i>     | 2.070 | 2.07E-11 |
| <i>ARRB2</i>     | 2.067 | 3.82E-16 |
| <i>STK31</i>     | 2.063 | 9.70E-06 |
| <i>CTSS</i>      | 2.063 | 1.18E-08 |
| <i>ZNF233</i>    | 2.050 | 5.37E-05 |
| <i>LRRC73</i>    | 2.048 | 1.69E-05 |
| <i>MYB</i>       | 2.047 | 1.51E-14 |
| <i>RAB11FIP3</i> | 2.044 | 3.49E-05 |
| <i>100129046</i> | 2.029 | 3.29E-14 |
| <i>TEAD2</i>     | 2.025 | 2.91E-17 |
| <i>PLCB4</i>     | 2.025 | 0.000444 |
| <i>CORO1A</i>    | 2.019 | 1.13E-31 |
| <i>ACCS</i>      | 2.006 | 7.84E-05 |
| <i>SYK</i>       | 2.002 | 1.96E-08 |

Supplementary table 7: Gene list – genes downregulated in both PT127 PDX and CLO when compared with PT127 cell line (fold change  $\geq 2$ ,  $p$ -adj= 0.001

| Gene List      | log2FoldChange | padj      |
|----------------|----------------|-----------|
| <i>FOSB</i>    | -7.241         | 1.82E-55  |
| <i>CAV1</i>    | -7.054         | 1.16E-101 |
| <i>AXL</i>     | -6.625         | 6.32E-262 |
| <i>RAB3B</i>   | -6.322         | 1.39E-60  |
| <i>FOS</i>     | -5.132         | 1.13E-31  |
| <i>PADI1</i>   | -4.767         | 1.24E-51  |
| <i>DUSP1</i>   | -4.670         | 2.09E-42  |
| <i>EHD2</i>    | -4.651         | 2.54E-09  |
| <i>EGR1</i>    | -4.637         | 3.22E-50  |
| <i>ATF3</i>    | -4.383         | 4.50E-09  |
| <i>TGM2</i>    | -4.348         | 3.35E-176 |
| <i>CYR61</i>   | -4.301         | 1.62E-62  |
| <i>OXTR</i>    | -4.236         | 1.98E-10  |
| <i>PHACTR3</i> | -4.210         | 1.13E-31  |
| <i>NR4A1</i>   | -4.174         | 6.61E-11  |
| <i>FOSL1</i>   | -3.986         | 2.47E-35  |
| <i>KRT86</i>   | -3.876         | 1.44E-19  |
| <i>SUSD2</i>   | -3.862         | 4.44E-26  |
| <i>AKAP12</i>  | -3.796         | 1.86E-64  |
| <i>ADGRF1</i>  | -3.731         | 9.83E-27  |
| <i>LCK</i>     | -3.681         | 2.45E-21  |
| <i>CAVIN1</i>  | -3.660         | 1.43E-78  |
| <i>PLK2</i>    | -3.623         | 2.30E-40  |
| <i>LGALS1</i>  | -3.598         | 4.75E-45  |
| <i>284454</i>  | -3.584         | 1.52E-09  |
| <i>ARHGDI3</i> | -3.580         | 2.63E-34  |
| <i>EDN1</i>    | -3.579         | 1.43E-64  |
| <i>UNC13D</i>  | -3.472         | 1.51E-27  |
| <i>MMP7</i>    | -3.463         | 1.17E-08  |
| <i>ELFN2</i>   | -3.455         | 1.30E-06  |
| <i>ANXA1</i>   | -3.415         | 4.82E-31  |
| <i>CACNG4</i>  | -3.391         | 2.59E-18  |
| <i>PLAU</i>    | -3.355         | 5.27E-60  |
| <i>KLF2</i>    | -3.347         | 1.90E-17  |
| <i>CAV2</i>    | -3.346         | 4.90E-24  |
| <i>GPAT3</i>   | -3.297         | 3.55E-28  |
| <i>HBEGF</i>   | -3.295         | 1.56E-07  |

|                    |        |          |
|--------------------|--------|----------|
| <i>MYBL1</i>       | -3.270 | 5.46E-06 |
| <i>CTGF</i>        | -3.252 | 4.80E-14 |
| <i>ERRF1</i>       | -3.243 | 6.42E-14 |
| <i>MICB</i>        | -3.203 | 1.24E-11 |
| <i>SMAD7</i>       | -3.144 | 2.10E-10 |
| <i>TSC22D3</i>     | -3.136 | 1.27E-12 |
| <i>THSD4</i>       | -3.083 | 2.45E-21 |
| <i>KRT80</i>       | -3.059 | 9.81E-55 |
| <i>SLC7A7</i>      | -3.044 | 1.05E-16 |
| <i>PMAIP1</i>      | -3.024 | 3.98E-15 |
| <i>652995</i>      | -3.020 | 5.44E-17 |
| <i>ID2</i>         | -3.014 | 2.31E-11 |
| <i>RGCC</i>        | -2.952 | 1.82E-29 |
| <i>LICAM</i>       | -2.873 | 2.27E-07 |
| <i>PLAUR</i>       | -2.868 | 5.74E-06 |
| <i>GADD45B</i>     | -2.860 | 8.18E-09 |
| <i>SLC16A4</i>     | -2.814 | 8.15E-26 |
| <i>ARHGAP29</i>    | -2.813 | 2.58E-08 |
| <i>LAT2</i>        | -2.792 | 3.03E-32 |
| <i>PEAR1</i>       | -2.791 | 2.23E-05 |
| <i>FGFBP1</i>      | -2.787 | 0.00016  |
| <i>ANO1</i>        | -2.774 | 1.11E-36 |
| <i>ZFP36</i>       | -2.761 | 1.81E-05 |
| <i>WNT7B</i>       | -2.753 | 2.44E-11 |
| <i>NCEH1</i>       | -2.711 | 4.27E-23 |
| <i>NTN4</i>        | -2.633 | 6.66E-05 |
| <i>MIR4435-2HG</i> | -2.628 | 7.08E-32 |
| <i>STEAP4</i>      | -2.623 | 3.44E-21 |
| <i>SNORC</i>       | -2.621 | 9.24E-14 |
| <i>CAVIN3</i>      | -2.618 | 5.03E-16 |
| <i>ANXA2R</i>      | -2.603 | 4.38E-10 |
| <i>CYTOR</i>       | -2.583 | 5.81E-09 |
| <i>RNF39</i>       | -2.571 | 1.95E-19 |
| <i>KLF6</i>        | -2.552 | 2.57E-05 |
| <i>ANLN</i>        | -2.544 | 3.89E-17 |
| <i>KLK7</i>        | -2.532 | 0.0007   |
| <i>ID3</i>         | -2.517 | 2.16E-05 |
| <i>ERFE</i>        | -2.493 | 6.50E-08 |

|                  |        |          |
|------------------|--------|----------|
| <i>100287314</i> | -2.489 | 7.83E-16 |
| <i>SGK1</i>      | -2.486 | 7.57E-21 |
| <i>TMPRSS13</i>  | -2.476 | 0.00031  |
| <i>CLCF1</i>     | -2.457 | 2.64E-08 |
| <i>ATP2B4</i>    | -2.452 | 1.11E-13 |
| <i>DUSP10</i>    | -2.448 | 1.77E-39 |
| <i>IL6R</i>      | -2.393 | 3.62E-24 |
| <i>OLFML2A</i>   | -2.376 | 4.05E-07 |
| <i>FAM122B</i>   | -2.376 | 2.04E-12 |
| <i>MSMO1</i>     | -2.363 | 3.79E-09 |
| <i>SMURF2</i>    | -2.356 | 6.07E-16 |
| <i>TNNT1</i>     | -2.347 | 2.70E-08 |
| <i>DCBLD2</i>    | -2.337 | 1.31E-05 |
| <i>221584</i>    | -2.336 | 9.97E-10 |
| <i>CHAC1</i>     | -2.331 | 4.38E-07 |
| <i>DUSP6</i>     | -2.327 | 1.22E-19 |
| <i>LIF</i>       | -2.319 | 4.58E-05 |
| <i>MOSPD1</i>    | -2.318 | 2.88E-09 |
| <i>ARNTL2</i>    | -2.299 | 4.73E-07 |
| <i>ZNF165</i>    | -2.291 | 1.88E-33 |
| <i>FAM122C</i>   | -2.291 | 5.25E-15 |
| <i>643977</i>    | -2.289 | 1.15E-13 |
| <i>TIMP2</i>     | -2.286 | 9.19E-49 |
| <i>ARSK</i>      | -2.263 | 1.54E-05 |
| <i>F3</i>        | -2.255 | 1.34E-07 |
| <i>SEMA7A</i>    | -2.223 | 2.26E-06 |
| <i>CDKN2B</i>    | -2.212 | 1.41E-05 |
| <i>100506906</i> | -2.206 | 0.00088  |

|                 |        |          |
|-----------------|--------|----------|
| <i>EVA1C</i>    | -2.205 | 7.97E-24 |
| <i>DUSP5</i>    | -2.190 | 0.00055  |
| <i>LAT</i>      | -2.182 | 1.07E-14 |
| <i>BCAR3</i>    | -2.176 | 9.14E-32 |
| <i>ITGB2</i>    | -2.171 | 1.16E-07 |
| <i>CXCL2</i>    | -2.162 | 1.06E-06 |
| <i>GRHL3</i>    | -2.145 | 2.98E-23 |
| <i>TTYH1</i>    | -2.144 | 1.43E-05 |
| <i>CITED2</i>   | -2.143 | 1.99E-29 |
| <i>HMGA1</i>    | -2.140 | 1.89E-15 |
| <i>PTAFR</i>    | -2.139 | 4.88E-19 |
| <i>B3GNTL1</i>  | -2.132 | 6.95E-11 |
| <i>AMIGO2</i>   | -2.130 | 1.33E-17 |
| <i>KRT7</i>     | -2.110 | 0.00060  |
| <i>RBMS2</i>    | -2.096 | 2.03E-10 |
| <i>FAM3C</i>    | -2.078 | 7.55E-22 |
| <i>SLC20A1</i>  | -2.068 | 1.79E-07 |
| <i>HES1</i>     | -2.066 | 2.02E-15 |
| <i>DENND3</i>   | -2.063 | 1.00E-06 |
| <i>KIAA0040</i> | -2.047 | 0.00049  |
| <i>HDAC9</i>    | -2.046 | 3.15E-13 |
| <i>VSIR</i>     | -2.044 | 1.01E-09 |
| <i>THBS1</i>    | -2.041 | 8.25E-18 |
| <i>S100A2</i>   | -2.015 | 4.64E-06 |
| <i>KIF20B</i>   | -2.011 | 0.00038  |
| <i>HMGCS1</i>   | -2.005 | 2.24E-07 |
| <i>ETSI</i>     | -2.000 | 2.01E-05 |



Supplementary table 8: Gene list – genes upregulated in both PT291 PDX and CLO when compared with PT291 cell line (fold change  $\geq 2$ ,  $p$ -adj= 0.001)

| Gene Name        | log2FoldChange | padj     |
|------------------|----------------|----------|
| <i>SERPINA5</i>  | 4.212          | 2.17E-14 |
| <i>CCDC114</i>   | 4.170          | 4.30E-22 |
| <i>PTK7</i>      | 4.061          | 2.95E-27 |
| <i>FCGBP</i>     | 3.931          | 1.87E-29 |
| <i>CCDC170</i>   | 3.607          | 4.53E-13 |
| <i>ANPEP</i>     | 3.575          | 1.43E-09 |
| <i>TFF3</i>      | 3.512          | 3.51E-11 |
| <i>NECTIN3</i>   | 3.469          | 4.17E-09 |
| <i>NDRG1</i>     | 3.461          | 1.94E-11 |
| <i>SERPINA4</i>  | 3.414          | 2.62E-13 |
| <i>PPIL6</i>     | 3.215          | 9.37E-07 |
| <i>FOXJ1</i>     | 3.037          | 2.97E-10 |
| <i>TGFB3</i>     | 3.015          | 8.47E-19 |
| <i>SLC29A4</i>   | 2.986          | 3.75E-07 |
| <i>PLEKHB1</i>   | 2.890          | 2.69E-14 |
| <i>CFAP73</i>    | 2.840          | 4.88E-07 |
| <i>DEPTOR</i>    | 2.811          | 2.36E-09 |
| <i>EGLN3</i>     | 2.794          | 1.90E-22 |
| <i>GCNT1</i>     | 2.778          | 1.82E-09 |
| <i>PPMIL</i>     | 2.771          | 3.59E-12 |
| <i>LRIG1</i>     | 2.709          | 8.57E-11 |
| <i>FKBP9P1</i>   | 2.685          | 5.22E-05 |
| <i>PRSS33</i>    | 2.646          | 0.00026  |
| <i>TRPM5</i>     | 2.596          | 0.00055  |
| <i>100506211</i> | 2.581          | 3.46E-09 |
| <i>CCDC40</i>    | 2.580          | 4.78E-08 |
| <i>WDR78</i>     | 2.576          | 2.32E-06 |
| <i>GNAZ</i>      | 2.512          | 8.39E-10 |
| <i>FAM222A</i>   | 2.509          | 1.38E-07 |
| <i>LINC00261</i> | 2.500          | 4.31E-05 |
| <i>ASRGL1</i>    | 2.444          | 2.60E-06 |

|                   |       |          |
|-------------------|-------|----------|
| <i>RCBTB2</i>     | 2.434 | 2.55E-11 |
| <i>SEMA3F</i>     | 2.362 | 2.31E-23 |
| <i>STXBP6</i>     | 2.343 | 1.99E-11 |
| <i>TMEM97</i>     | 2.316 | 0.00070  |
| <i>LRRC73</i>     | 2.315 | 2.94E-11 |
| <i>ITPR2</i>      | 2.306 | 1.32E-05 |
| <i>NAALADL2</i>   | 2.272 | 5.79E-14 |
| <i>RASL11A</i>    | 2.272 | 7.44E-05 |
| <i>APBA1</i>      | 2.271 | 4.59E-08 |
| <i>FHAD1</i>      | 2.271 | 6.05E-10 |
| <i>FAM227A</i>    | 2.262 | 5.65E-10 |
| <i>CLU</i>        | 2.239 | 1.20E-05 |
| <i>RNASE1</i>     | 2.230 | 4.96E-05 |
| <i>DEGS2</i>      | 2.214 | 1.16E-08 |
| <i>RSPH1</i>      | 2.202 | 2.63E-08 |
| <i>HNF1A-AS1</i>  | 2.194 | 9.64E-07 |
| <i>PTPRN2</i>     | 2.192 | 3.33E-13 |
| <i>SYNM</i>       | 2.179 | 1.02E-05 |
| <i>C4A</i>        | 2.176 | 7.21E-08 |
| <i>PPP1R1B</i>    | 2.151 | 1.64E-20 |
| <i>USP2</i>       | 2.146 | 6.50E-06 |
| <i>TMEM231</i>    | 2.144 | 1.60E-05 |
| <i>C4B</i>        | 2.131 | 8.57E-08 |
| <i>ST6GALNAC1</i> | 2.128 | 4.31E-05 |
| <i>MESP1</i>      | 2.083 | 6.24E-09 |
| <i>SNED1</i>      | 2.082 | 2.69E-13 |
| <i>ALDOC</i>      | 2.066 | 0.00069  |
| <i>PROM1</i>      | 2.050 | 1.70E-12 |
| <i>HIST1H4K</i>   | 2.043 | 1.65E-06 |
| <i>SLC4A8</i>     | 2.042 | 2.91E-07 |
| <i>FAM110C</i>    | 2.018 | 1.47E-06 |

Supplementary table 9: Gene list – genes downregulated in both PT291 PDX and CLO when compared with PT291 cell line (fold change  $\geq 2$ ,  $p$ -adj= 0.001)

| Gene Name       | log2FoldChange | padj      |
|-----------------|----------------|-----------|
| <i>AHNAK2</i>   | -5.316         | 1.28E-110 |
| <i>AXL</i>      | -5.301         | 2.00E-44  |
| <i>COL17A1</i>  | -4.747         | 0.0002    |
| <i>CDHR2</i>    | -4.682         | 4.55E-11  |
| <i>ECM1</i>     | -4.628         | 9.92E-49  |
| <i>FOSB</i>     | -4.491         | 2.55E-11  |
| <i>ID3</i>      | -4.263         | 8.26E-17  |
| <i>SEMA7A</i>   | -3.985         | 5.67E-39  |
| <i>IL23A</i>    | -3.926         | 1.92E-29  |
| <i>AKAP12</i>   | -3.887         | 3.40E-11  |
| <i>TM4SF4</i>   | -3.865         | 0.00055   |
| <i>FLNC</i>     | -3.848         | 1.75E-08  |
| <i>CDH17</i>    | -3.757         | 0.00044   |
| <i>LAT2</i>     | -3.757         | 2.11E-46  |
| <i>CAVIN1</i>   | -3.704         | 8.30E-24  |
| <i>UNC13D</i>   | -3.629         | 8.24E-24  |
| <i>SNCG</i>     | -3.594         | 4.14E-08  |
| <i>SULT2B1</i>  | -3.551         | 1.25E-11  |
| <i>LGALS1</i>   | -3.437         | 1.46E-26  |
| <i>BTBD11</i>   | -3.424         | 6.91E-09  |
| <i>RAB3B</i>    | -3.422         | 1.57E-10  |
| <i>FOSL1</i>    | -3.414         | 2.08E-10  |
| <i>PADI1</i>    | -3.414         | 1.48E-10  |
| <i>SDCBP2</i>   | -3.338         | 1.90E-08  |
| <i>CAV1</i>     | -3.321         | 3.16E-08  |
| <i>ID1</i>      | -3.267         | 3.22E-07  |
| <i>AREG</i>     | -3.230         | 2.10E-48  |
| <i>DUSP1</i>    | -3.224         | 2.53E-16  |
| 727738          | -3.172         | 2.10E-48  |
| <i>F3</i>       | -3.047         | 9.10E-15  |
| <i>CPNE7</i>    | -2.962         | 2.07E-06  |
| <i>ABLIM3</i>   | -2.933         | 2.95E-27  |
| <i>CYP4F3</i>   | -2.925         | 0.00035   |
| <i>PLAU</i>     | -2.918         | 1.10E-17  |
| <i>SMAD7</i>    | -2.908         | 3.01E-18  |
| <i>AMIGO2</i>   | -2.875         | 3.99E-21  |
| <i>GPAT3</i>    | -2.828         | 6.09E-09  |
| <i>PHACTR3</i>  | -2.787         | 5.07E-06  |
| <i>EMP1</i>     | -2.774         | 6.03E-25  |
| <i>GJB3</i>     | -2.763         | 2.63E-34  |
| <i>PLAUR</i>    | -2.757         | 3.59E-17  |
| <i>MDF1</i>     | -2.757         | 2.68E-12  |
| <i>GEM</i>      | -2.736         | 2.77E-18  |
| <i>IL18</i>     | -2.683         | 1.84E-10  |
| 652995          | -2.681         | 2.51E-05  |
| <i>DCBLD2</i>   | -2.678         | 8.37E-11  |
| <i>ELFN2</i>    | -2.639         | 1.03E-07  |
| <i>SMIM5</i>    | -2.634         | 0.00094   |
| <i>SDR16C5</i>  | -2.617         | 9.01E-06  |
| <i>OXTR</i>     | -2.611         | 9.83E-06  |
| <i>PCED1B</i>   | -2.605         | 7.03E-05  |
| <i>CYP3A5</i>   | -2.588         | 1.02E-05  |
| <i>RASA3</i>    | -2.555         | 1.78E-06  |
| <i>GPSM1</i>    | -2.514         | 0.00032   |
| <i>UNC5B</i>    | -2.485         | 0.0006    |
| <i>PLEKHN1</i>  | -2.468         | 2.97E-10  |
| <i>P2RY2</i>    | -2.443         | 3.57E-07  |
| <i>ETS1</i>     | -2.436         | 8.63E-08  |
| <i>CRYBG2</i>   | -2.398         | 4.15E-06  |
| <i>ARL4C</i>    | -2.394         | 4.33E-09  |
| <i>TNFAIP3</i>  | -2.394         | 8.60E-05  |
| <i>KLK11</i>    | -2.391         | 3.57E-07  |
| <i>CXCL8</i>    | -2.391         | 9.14E-10  |
| <i>DUSP10</i>   | -2.375         | 1.28E-07  |
| <i>IL32</i>     | -2.373         | 1.11E-06  |
| 8511            | -2.352         | 8.08E-05  |
| <i>ADAMTSL5</i> | -2.340         | 1.17E-08  |
| <i>PTPRR</i>    | -2.336         | 5.46E-09  |
| <i>SYNGR3</i>   | -2.310         | 0.00077   |
| <i>PSORSIC1</i> | -2.296         | 1.16E-06  |
| <i>PHLDB2</i>   | -2.277         | 1.48E-09  |
| <i>MMP7</i>     | -2.247         | 1.24E-06  |
| <i>CD55</i>     | -2.236         | 1.34E-13  |
| <i>MMP23B</i>   | -2.226         | 7.11E-05  |
| <i>ITGA2</i>    | -2.221         | 7.93E-26  |
| <i>STOM</i>     | -2.217         | 2.66E-07  |

|                  |        |          |
|------------------|--------|----------|
| <i>KIAA0040</i>  | -2.189 | 1.50E-06 |
| <i>MTMR11</i>    | -2.186 | 1.81E-05 |
| <i>PERM1</i>     | -2.178 | 4.58E-06 |
| <i>PROCR</i>     | -2.177 | 9.52E-11 |
| <i>HEPH</i>      | -2.163 | 4.92E-05 |
| <i>IRS2</i>      | -2.145 | 1.60E-15 |
| <i>KLK7</i>      | -2.129 | 0.00032  |
| <i>SH3TC2</i>    | -2.120 | 1.15E-19 |
| <i>PLCXD2</i>    | -2.119 | 0.00030  |
| <i>PTPRB</i>     | -2.114 | 1.28E-24 |
| <i>LIF</i>       | -2.103 | 1.34E-34 |
| <i>PRDM1</i>     | -2.102 | 2.46E-07 |
| <i>PIM1</i>      | -2.094 | 2.07E-09 |
| <i>RND1</i>      | -2.089 | 0.00030  |
| <i>TNFRSF11B</i> | -2.084 | 8.31E-11 |

|                 |        |          |
|-----------------|--------|----------|
| <i>SERPINB5</i> | -2.083 | 8.15E-05 |
| <i>SLC22A3</i>  | -2.081 | 7.58E-15 |
| <i>SI00A2</i>   | -2.070 | 3.58E-06 |
| <i>DUSP5</i>    | -2.058 | 4.04E-08 |
| <i>ARL14.00</i> | -2.058 | 0.0002   |
| <i>FSCN1</i>    | -2.054 | 0.00066  |
| <i>284454</i>   | -2.053 | 2.58E-10 |
| <i>KLK10</i>    | -2.043 | 4.77E-07 |
| <i>CLCF1</i>    | -2.041 | 1.10E-06 |
| <i>LMTK3</i>    | -2.035 | 0.00051  |
| <i>SMIM6</i>    | -2.019 | 2.29E-05 |
| <i>CAV2</i>     | -2.012 | 1.42E-14 |
| <i>TNFRSF6B</i> | -2.006 | 9.01E-05 |
| <i>EPHB6</i>    | -2.004 | 2.91E-07 |

## Supplementary Figures

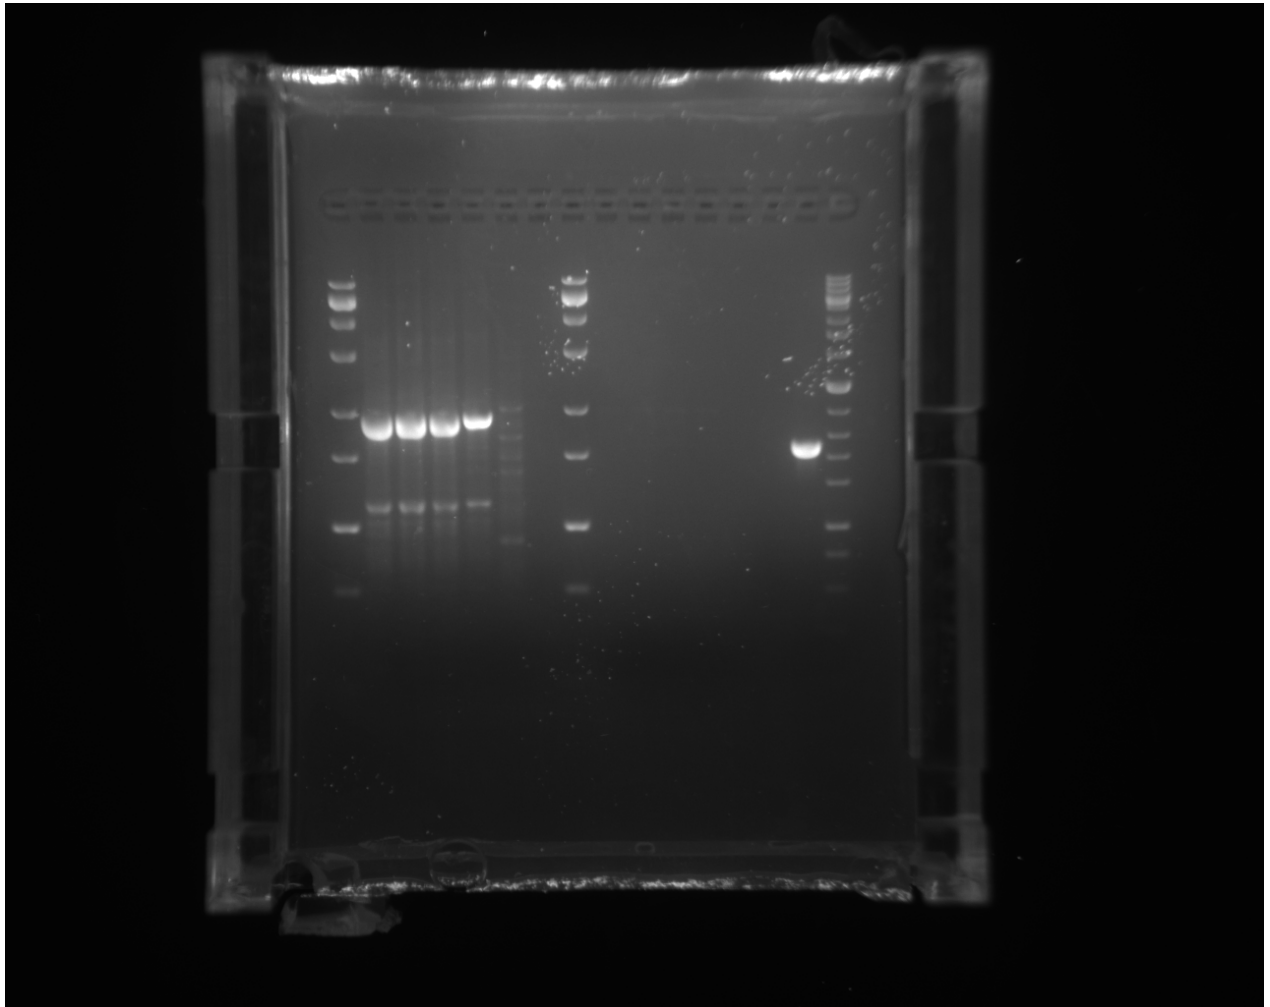

*Supplementary figure 1: Entire blot from figure 3 Electrophoresis gels of samples (1) PT291 primary cell line (2) PT127 primary cell line (3) PT291 organoids (4) BxPC3 (negative control) (5) Murine cell line C2C12 (positive control) for (A) Products of first PCR and (B) Nested PCR using mouse-specific primers*
